# Supplementary material
Source: publisher site journal article supplement (https://www.dovepress.com/article/305054)
Supplement: Supplementary file 1 [file get_supplementary_file.php]

| Variable | OR (95%CI) | *P* value |
| --- | --- | --- |
| Male | 0.918(0.486,1.732) | 0.792 |
| Age | 1.911(1.144,3.193) | 0.013 |
| HbA1c a | 1.057(0.608,1.838) | 0.843 |
| HOMA-Ba | 0.646(0.335,1.246) | 0.192 |
| HOMA-IR a | 2.533(1.369,4.685) | 0.003 |
| Leptin a | 1.929(1.122,3.316) | 0.017 |
| Resistin a | 2.980(1.779,4.990) | <0.001 |
| Smoker | 2.940(1.450,5.962) | 0.003 |
| Drinker | 0.725(0.332,1.583) | 0.420 |

**Sup Table Logistic regression analysis of risk factors for diabetic nephropathy in 309 T2DM patients.**

a The median of variables (HbA1c, HOMA-B, HOMA-IR, leptin and resistin) were used as cut-offs when creating subgroups. The values less than median were as the reference.
